# Supplementary material
Source: publisher site journal article supplement (https://www.spandidos-publications.com/4907/downloadSupplementary)

Figure S1. siSMAD2/3 transfection was successful. After transfection with siSMAD2/3, the mRNA levels of (A) SMAD2 and (B) SMAD3 were significantly lower than those in the NC group. si, small interfering RNA; NC, negative control.

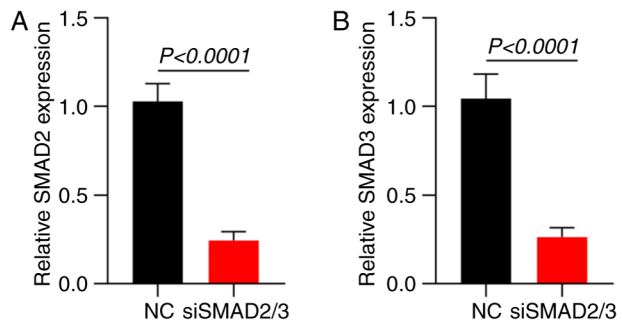

Supplement: Supplementary file 1 [file downloadSupplementary]
